# Supplementary material for: Loss and Reorganisation of Superficial White Matter in Alzheimer’s disease: A Diffusion MRI study
Source: bioRxiv or medRxiv preprint supplement (doi:10.1101/2021.05.07.21256728), 2021-05-14
Supplement: Supplementary file [file media-1.pdf]

# Supplementary Material

## Linear Mixed Effect Models

### Model

Below is model used to fit the data to each diffusion metric (FA, MD, NDI, ODI and TF) in each ROI (n = 15). Random effects were separated by group, with random intercepts and slopes allowed to be correlated (i.e. unstructured covariance structure) for the majority of models:

$$y_{ijk} = (\beta_{0i} + \beta_{0ij}) + (\beta_{1i} + \beta_{1ij})d_k + \beta_{2i}d_k^2 + \beta_{3i}y_{ij} + \epsilon_{ijk}$$
$$\begin{pmatrix} b_{0ij} \\ b_{1ij} \end{pmatrix} \sim N \left( 0, \begin{pmatrix} \sigma_{b0}^2 & \sigma_{b0b1} \\ \sigma_{b0b1} & \sigma_{b1}^2 \end{pmatrix} \right), \epsilon_{ijk} \sim N(0, \sigma_{\epsilon}^2)$$

Where, for the  $k$ th ( $k=1,2,3,4$ ) measurement for the  $j$ th participant ( $j=1, \dots, n_i$ ) in the  $i$ th group ( $i=1$  YOAD,  $i=2$  control):

$y_{ijk}$  = dMRI metric  
 $d_k$  = Fixed distance (mm) sampled from the GM/WM boundary. Moving from GM towards the SWM/DWM:

- GM (+1mm) was set as  $d_1=0$
- GM/WM boundary (0mm) as  $d_2=1$
- SWM (-1mm) as  $d_3=2$
- SWM/DWM (-2mm) as  $d_4=3$

$c_{ij}$  = cortical thickness (mm) as a constant over  $k$   
 $\beta_{0i}$  = Fixed intercepts for the two groups  
 $\beta_{1i}$  = Fixed linear effects for the two groups  
 $\beta_{2i}$  = Fixed quadratic effects for the two groups  
 $\beta_{3i}$  = Fixed cortical thickness effect  
 $b_{0ij}$  = Random intercept for the  $j$ th participant in the  $i$ th group  
 $b_{1ij}$  = Random slope for the  $j$ th participant in the  $i$ th group  
 $\epsilon_{ijk}$  = Residual

In regions and dMRI metrics where the model was too complex (6/75 models), we fit the same model but removed the control group's random slope.

### Example R code for fitting models

The above model was implemented in R using the `lme4` library. Separate models were run for each combination of dMRI metric and ROI. Group-specific random effects were achieved by creating separate intercept and distance vectors (e.g. `(0 + control + distance_control | Participant)`). Below shows example code for modelling NDI measures across the GM/WM boundary in the parahippocampal cortex (`phippoc_nDI`) where random intercepts and slopes are included for both control and YOAD groups.

```
# Set tolerance for convergence to resolve convergence problems at cost of slower fit (see lme4 '?convergence' help file)
strict_tol <- lmerControl(optimizer="bobyqa", optArgs=list(xtol_abs=1e-8, ftol_abs=1e-8))

# Run model
phippoc_nDI_model <- lmer(DWI ~ distance + I(distance^2) + group + distance*group + I(distance^2)*group + cortical_thick +
  (0 + control + distance_control | Participant) +
  (0 + AD + distance_AD | Participant),
  data=phippoc_nDI,
  REML=TRUE,
  control = strict_tol)

# View model results
summary(phippoc_nDI_model)
```

### Extracting Average Marginal Effects (AMEs)

Marginal effects were estimated from the LME models to assess differences between YOAD and control groups at each sampled distance along the cortical profile. This was done using the `margins` library which emulates the average marginal effects command used in STATA.

```
# Extract marginal effects at each distance (0:3 = 1mm to -2mm) between groups (0 = control, 1 = YOAD)
phippoc_nDI_marg <- as.data.frame(summary(margins(phippoc_nDI_model, at = list(distance = 0:3, group = 0:1))))

# View marginal effects between groups
phippoc_nDI_marg %>% filter(factor == "group")
```

The output provides the average marginal effect (AME) between groups at each distance, standard error, z value and p value. All AME p-values were then adjusted using false discovery rate (FDR) using the `p.adjust` package, where  $pFDR < 0.05$  indicates statistical significance at our chosen threshold of 0.05 after correcting for multiple comparisons.

## Average Marginal Effects

### Plots

Supplementary Figure 1: DTI AMEs for all ROIs Along the Cortical Profile

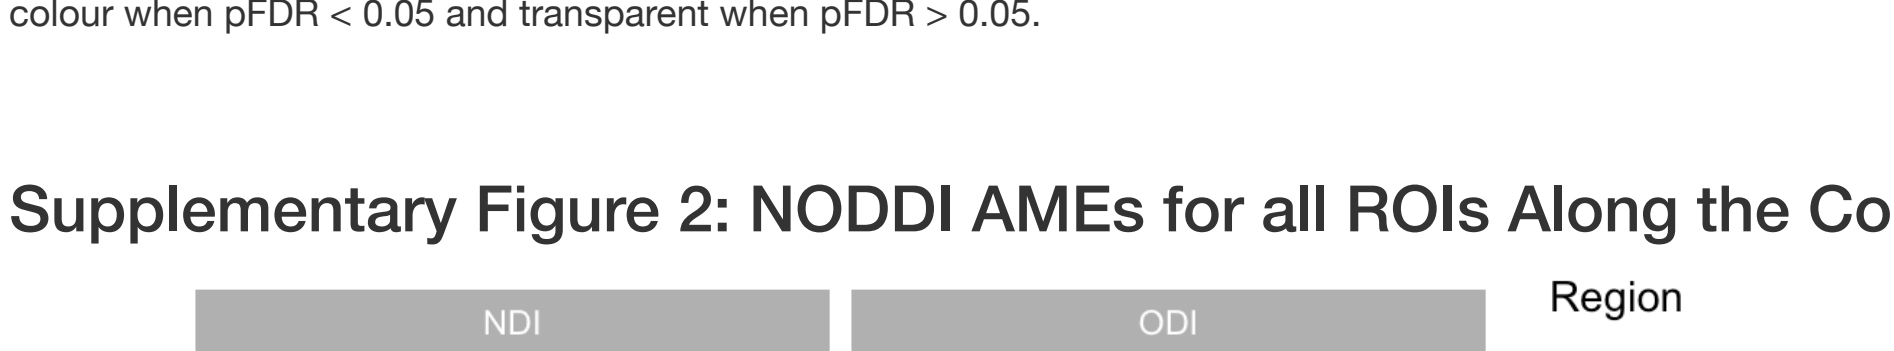

Supplementary Figure 1: Plots showing DTI AMEs of each ROI across the GM/WM boundary from GM to SWM/DWM. AMEs are shown in full colour when  $pFDR < 0.05$  and transparent when  $pFDR > 0.05$ .

Supplementary Figure 2: NODDI AMEs for all ROIs Along the Cortical Profile

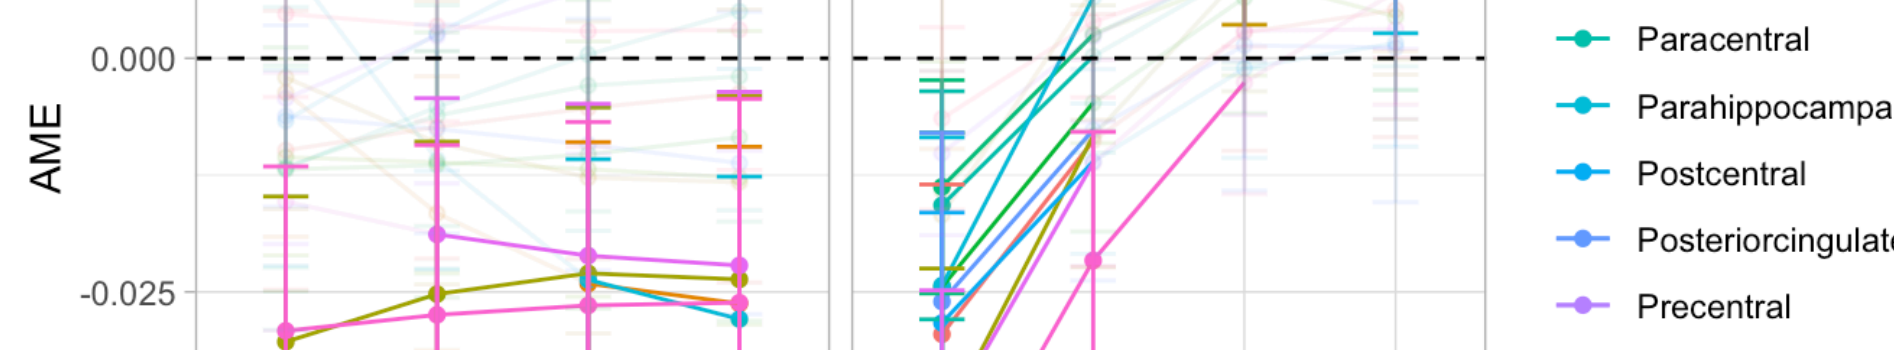

Supplementary Figure 2: Plots showing NODDI AMEs of each ROI across the GM/WM boundary from GM to SWM/DWM. AMEs are shown in full colour when  $pFDR < 0.05$  and transparent when  $pFDR > 0.05$ .

Supplementary Figure 3: TF AMEs for all ROIs Along the Cortical Profile

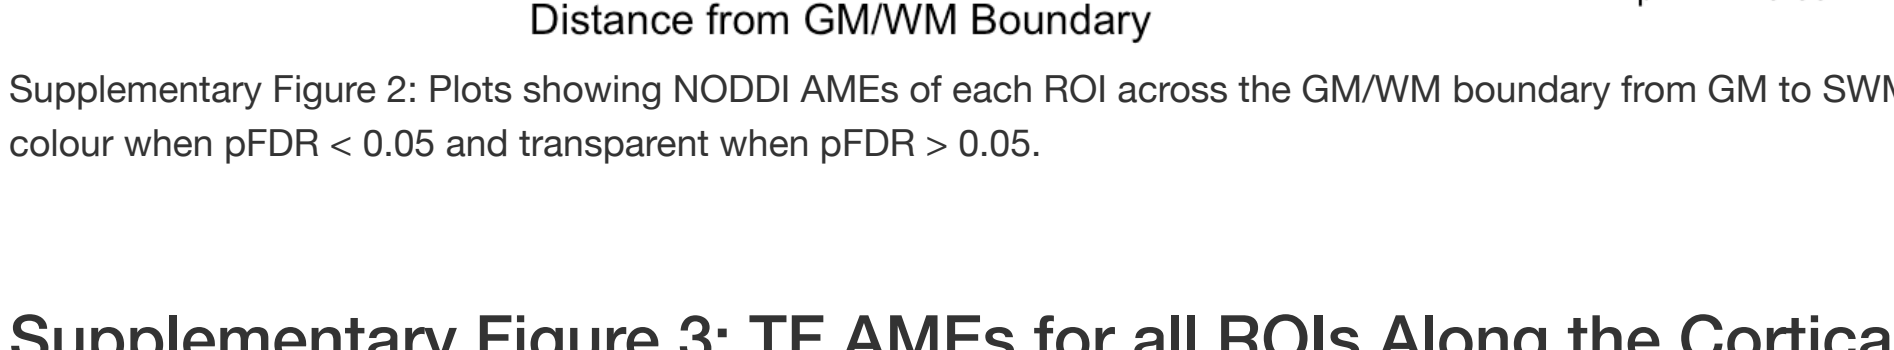

Supplementary Figure 3: Plots showing TF AMEs of each ROI across the GM/WM boundary from GM to SWM/DWM. AMEs are shown in full colour when  $pFDR < 0.05$  and transparent when  $pFDR > 0.05$ .

### Tables

Supplementary Table 1: DTI AMEs for all ROIs and Distances

| ROI                | Measure | GM                      | GM/WM                   | SWM                     | SWM/DWM                 |
|--------------------|---------|-------------------------|-------------------------|-------------------------|-------------------------|
| Cuneus             | FA      | 0.017 [-0.025, 0.059]   | 0.011 [-0.025, 0.051]   | -0.004 [-0.015, 0.012]  | 0.006 [-0.012, 0.025]   |
|                    | MD      | 0.247 [0.188, 0.306]    | 0.103 [0.060, 0.146]    | -0.013 [-0.017, 0.042]  | -0.004 [-0.027, 0.019]  |
| Entorhinal         | FA      | -0.003 [-0.046, -0.019] | -0.001 [-0.046, -0.049] | -0.001 [-0.046, -0.046] | -0.002 [-0.042, -0.002] |
|                    | MD      | 0.160 [0.108, 0.212]    | 0.000 [0.002, 0.198]    | 0.016 [-0.005, 0.027]   | 0.027 [-0.001, 0.075]   |
| Fusiform           | FA      | -0.004 [-0.013, 0.006]  | -0.005 [-0.016, 0.006]  | -0.003 [-0.014, 0.008]  | 0.004 [-0.010, 0.018]   |
|                    | MD      | 0.176 [0.104, 0.225]    | 0.044 [-0.013, 0.096]   | -0.011 [-0.045, 0.023]  | -0.016 [-0.041, 0.010]  |
| Inferioparietal    | FA      | -0.002 [-0.027, -0.004] | -0.015 [-0.020, 0.001]  | -0.009 [-0.027, 0.009]  | -0.007 [-0.027, 0.014]  |
|                    | MD      | 0.341 [0.267, 0.414]    | 0.123 [0.096, 0.178]    | 0.002 [-0.046, 0.043]   | -0.004 [-0.065, 0.017]  |
| Inferiortemporal   | FA      | -0.006 [-0.015, 0.003]  | -0.002 [-0.012, 0.008]  | -0.010 [-0.016, 0.013]  | 0.004 [-0.011, 0.016]   |
|                    | MD      | 0.150 [0.114, 0.186]    | 0.047 [0.014, 0.078]    | -0.010 [-0.027, 0.017]  | -0.013 [-0.041, 0.010]  |
| Laterooccipital    | FA      | -0.016 [-0.038, -0.005] | -0.012 [-0.033, -0.001] | -0.005 [-0.016, 0.008]  | 0.005 [-0.012, 0.021]   |
|                    | MD      | 0.300 [0.234, 0.371]    | 0.144 [0.090, 0.196]    | 0.006 [-0.046, 0.078]   | -0.011 [-0.058, 0.016]  |
| Middletemporal     | FA      | -0.011 [-0.021, -0.002] | -0.006 [-0.015, 0.003]  | -0.001 [-0.012, 0.010]  | 0.004 [-0.015, 0.018]   |
|                    | MD      | 0.214 [0.161, 0.266]    | 0.007 [0.003, 0.106]    | -0.014 [-0.042, 0.014]  | -0.001 [-0.058, 0.050]  |
| Paracentral        | FA      | -0.016 [-0.035, 0.003]  | -0.014 [-0.034, 0.006]  | -0.009 [-0.031, 0.014]  | 0.001 [-0.025, 0.026]   |
|                    | MD      | 0.144 [0.083, 0.205]    | 0.006 [0.017, 0.006]    | -0.001 [-0.027, -0.013] | -0.002 [-0.061, 0.050]  |
| Parahippocampal    | FA      | -0.015 [-0.027, -0.001] | -0.024 [-0.026, -0.019] | -0.020 [-0.028, -0.012] | -0.021 [-0.037, -0.005] |
|                    | MD      | 0.177 [0.106, 0.227]    | 0.002 [0.047, 0.115]    | 0.000 [0.009, 0.007]    | 0.005 [0.006, 0.003]    |
| Postcentral        | FA      | -0.012 [-0.031, 0.004]  | -0.003 [-0.025, 0.019]  | -0.011 [-0.036, 0.027]  | 0.009 [0.016, 0.047]    |
|                    | MD      | 0.200 [0.146, 0.274]    | 0.019 [0.003, 0.101]    | -0.007 [-0.034, 0.019]  | -0.004 [0.016, 0.071]   |
| Posteriorcingulate | FA      | -0.004 [-0.016, 0.007]  | -0.006 [-0.016, 0.004]  | -0.007 [-0.028, 0.014]  | -0.004 [-0.027, 0.020]  |
|                    | MD      | 0.159 [0.116, 0.186]    | 0.006 [0.006, 0.005]    | 0.005 [-0.013, 0.023]   | 0.006 [0.017, 0.028]    |
| Precuneus          | FA      | -0.010 [-0.036, 0.007]  | -0.003 [-0.016, 0.010]  | -0.003 [-0.016, 0.010]  | 0.010 [-0.007, 0.027]   |
|                    | MD      | 0.140 [0.077, 0.211]    | 0.002 [0.007, 0.096]    | -0.011 [-0.045, 0.013]  | -0.008 [-0.066, -0.005] |
| Superiorparietal   | FA      | -0.010 [-0.030, -0.002] | -0.006 [-0.022, 0.009]  | -0.002 [-0.016, 0.012]  | 0.001 [-0.017, 0.019]   |
|                    | MD      | 0.200 [0.207, 0.330]    | 0.001 [0.002, 0.106]    | -0.010 [-0.042, 0.022]  | -0.019 [-0.058, 0.019]  |
| Superiortemporal   | FA      | -0.009 [-0.044, -0.013] | -0.016 [-0.035, -0.002] | -0.010 [-0.028, 0.007]  | -0.006 [-0.025, 0.013]  |
|                    | MD      | 0.306 [0.278, 0.434]    | 0.156 [0.098, 0.213]    | 0.007 [-0.004, 0.078]   | 0.001 [-0.037, 0.039]   |
| Superioroccipital  | FA      | -0.008 [-0.030, 0.014]  | -0.001 [-0.012, 0.010]  | -0.004 [-0.008, 0.006]  | 0.007 [-0.006, 0.020]   |
|                    | MD      | 0.140 [0.101, 0.188]    | 0.026 [-0.001, 0.050]   | -0.001 [-0.053, -0.014] | -0.008 [-0.063, -0.013] |

Note: Values reflect Average Marginal Effects (AME) and associated 95% confidence intervals. Colours indicate FDR adjusted p-value thresholds. Red =  $pFDR < 0.01$ , orange =  $pFDR < 0.01$ , blue =  $pFDR < 0.05$ .

Supplementary Table 2: NODDI AMEs for all ROIs and Distances

| ROI                | Measure | GM                      | GM/WM                   | SWM                     | SWM/DWM                 |
|--------------------|---------|-------------------------|-------------------------|-------------------------|-------------------------|
| Cuneus             | NDI     | -0.010 [-0.025, 0.005]  | -0.007 [-0.021, 0.007]  | -0.005 [-0.021, 0.010]  | -0.004 [-0.024, 0.016]  |
|                    | ODI     | -0.000 [-0.046, -0.014] | -0.009 [-0.022, 0.003]  | -0.003 [-0.016, 0.010]  | 0.006 [-0.008, 0.019]   |
| Entorhinal         | NDI     | -0.004 [-0.016, 0.012]  | -0.017 [-0.031, -0.002] | -0.021 [-0.038, -0.005] | -0.025 [-0.043, -0.007] |
|                    | ODI     | 0.006 [-0.015, 0.025]   | 0.020 [0.016, 0.045]    | 0.021 [0.016, 0.048]    | 0.021 [0.001, 0.041]    |
| Fusiform           | NDI     | -0.002 [-0.016, 0.012]  | -0.006 [-0.024, 0.004]  | -0.013 [-0.028, 0.004]  | -0.013 [-0.032, 0.005]  |
|                    | ODI     | -0.017 [-0.032, -0.001] | 0.007 [-0.007, 0.021]   | 0.017 [0.004, 0.030]    | 0.012 [0.002, 0.026]    |
| Inferioparietal    | NDI     | -0.000 [-0.044, -0.013] | -0.025 [-0.045, -0.005] | -0.003 [-0.041, -0.001] | -0.004 [-0.044, -0.004] |
|                    | ODI     | -0.009 [-0.058, -0.002] | -0.008 [-0.022, 0.006]  | -0.001 [-0.004, 0.023]  | 0.014 [0.000, 0.027]    |
| Inferiortemporal   | NDI     | -0.011 [-0.021, 0.000]  | -0.011 [-0.033, 0.011]  | -0.010 [-0.036, 0.003]  | -0.013 [-0.036, 0.003]  |
|                    | ODI     | -0.014 [-0.038, 0.003]  | 0.003 [-0.005, 0.016]   | 0.001 [-0.002, 0.018]   | 0.004 [-0.007, 0.015]   |
| Laterooccipital    | NDI     | -0.012 [-0.035, 0.001]  | -0.011 [-0.036, 0.003]  | -0.010 [-0.027, 0.006]  | -0.008 [-0.028, 0.011]  |
|                    | ODI     | -0.024 [-0.041, -0.006] | -0.006 [-0.016, 0.009]  | -0.004 [-0.006, 0.019]  | -0.001 [-0.003, 0.002]  |
| Middletemporal     | NDI     | -0.012 [-0.022, -0.001] | -0.006 [-0.016, 0.006]  | -0.003 [-0.016, 0.011]  | -0.002 [-0.017, 0.014]  |
|                    | ODI     | 0.014 [-0.023, -0.002]  | 0.001 [-0.006, 0.010]   | 0.010 [0.000, 0.020]    | 0.005 [-0.003, 0.013]   |
| Paracentral        | NDI     | -0.012 [-0.028, 0.005]  | -0.005 [-0.016, 0.012]  | -0.003 [-0.016, 0.010]  | 0.005 [-0.016, 0.026]   |
|                    | ODI     | -0.016 [-0.038, -0.004] | 0.000 [-0.012, 0.011]   | 0.009 [-0.001, 0.020]   | 0.012 [-0.001, 0.024]   |
| Parahippocampal    | NDI     | -0.011 [-0.026, 0.004]  | -0.011 [-0.028, 0.006]  | -0.007 [-0.024, 0.010]  | -0.004 [-0.024, -0.001] |
|                    | ODI     | -0.004 [-0.016, 0.008]  | 0.003 [-0.003, 0.009]   | 0.001 [-0.011, 0.013]   | 0.016 [0.003, 0.029]    |
| Postcentral        | NDI     | -0.008 [-0.046, -0.017] | -0.011 [-0.021, -0.001] | -0.001 [-0.011, 0.008]  | -0.001 [-0.007, 0.003]  |
|                    | ODI     | -0.006 [-0.016, 0.004]  | -0.006 [-0.016, 0.004]  | -0.008 [-0.023, 0.006]  | -0.011 [-0.027, 0.015]  |
| Posteriorcingulate | NDI     | -0.004 [-0.024, -0.006] | -0.006 [-0.024, 0.008]  | -0.001 [-0.014, 0.017]  | 0.011 [-0.016, 0.030]   |
|                    | ODI     | -0.004 [-0.020, 0.011]  | 0.002 [-0.015, 0.019]   | 0.007 [-0.016, 0.029]   | 0.011 [-0.016, 0.030]   |
| Precuneus          | NDI     | -0.010 [-0.016, -0.001] | 0.002 [-0.007, 0.011]   | 0.011 [0.000, 0.021]    | 0.014 [0.001, 0.026]    |
|                    | ODI     | -0.015 [-0.029, -0.002] | -0.019 [-0.033, -0.004] | -0.021 [-0.037, -0.005] | -0.022 [-0.041, -0.004] |
| Superiorparietal   | NDI     | -0.009 [-0.054, -0.025] | -0.011 [-0.022, 0.000]  | -0.003 [-0.006, 0.013]  | 0.003 [-0.008, 0.013]   |
|                    | ODI     | -0.020 [-0.047, -0.012] | -0.027 [-0.046, -0.008] | -0.006 [-0.046, -0.007] | -0.006 [-0.046, -0.004] |
| Superiortemporal   | NDI     | -0.005 [-0.004, 0.014]  | -0.002 [-0.012, 0.016]  | -0.003 [-0.016, 0.009]  | 0.007 [-0.005, 0.019]   |
|                    | ODI     | 0.005 [-0.004, 0.014]   | 0.003 [-0.007, 0.016]   | 0.003 [-0.008, 0.013]   | 0.003 [-0.012, 0.018]   |
| Superioroccipital  | NDI     | -0.006 [-0.016, 0.003]  | 0.004 [-0.004, 0.012]   | 0.009 [0.000, 0.017]    | 0.010 [0.000, 0.020]    |
|                    | ODI     | -0.001 [-0.016, 0.013]  | -0.001 [-0.016, 0.013]  | -0.001 [-0.016, 0.013]  | -0.001 [-0.016, 0.013]  |

Note: Values reflect Average Marginal Effects (AME) and associated 95% confidence intervals. Colours indicate FDR adjusted p-value thresholds. Red =  $pFDR < 0.01$ , orange =  $pFDR < 0.01$ , blue =  $pFDR < 0.05$ .

Supplementary Table 3: Tissue Fraction AMEs for all ROIs and Distances

| ROI              | Measure | GM                    | GM/WM                  | SWM                    | SWM/DWM                |
|------------------|---------|-----------------------|------------------------|------------------------|------------------------|
| Cuneus           | FA      | -0.102 [0.15, 0.35]   | -0.076 [-0.042, 0.066] | -0.007 [-0.010, 0.001] | -0.004 [0.016, 0.036]  |
|                  | MD      | -0.094 [0.152, 0.300] | -0.049 [0.074, 0.161]  | -0.002 [0.028, 0.018]  | -0.004 [0.022, 0.024]  |
| Entorhinal       | FA      | -0.117 [0.121, 0.143] | -0.069 [0.126, 0.165]  | -0.002 [-0.024, 0.020] | -0.009 [-0.022, 0.015] |
|                  | MD      | -0.117 [0.121, 0.143] | -0.069 [0.126, 0.165]  | -0.002 [-0.024, 0.020] | -0.009 [-0.022, 0.015] |
| Fusiform         | FA      | -0.118 [0.125, 0.193] | -0.100 [0.117, 0.187]  | -0.002 [-0.040, 0.038] | -0.017 [0.005, 0.049]  |
|                  | MD      | -0.119 [0.126, 0.205] | -0.098 [0.125, 0.178]  | -0.002 [-0.028, 0.024] | -0.026 [0.005, 0.048]  |
| Inferioparietal  | FA      | -0.119 [0.126, 0.205] | -0.098 [0.125, 0.178]  | -0.002 [-0.028, 0.024] | -0.026 [0.005, 0.048]  |
|                  | MD      | -0.119 [0.126, 0.205] | -0.098 [0.125, 0.178]  | -0.002 [-0.028, 0.024] | -0.026 [0.005, 0.048]  |
| Inferiortemporal | FA      | -0.119 [0.126, 0.205] | -0.098 [0.125, 0.178]  | -0.002 [-0.028, 0.024] | -0.026 [0.005, 0.048]  |
|                  | MD      | -0.119 [0.126, 0.205] | -0.098 [0.125, 0.178]  | -0.002 [-0.028, 0.024] | -0.026 [0.005, 0.048]  |
| Laterooccipital  | FA      | -0.119 [0.126, 0.205] | -0.098 [0.125, 0.178]  | -0.002 [-0.028, 0.024] | -0.026 [0.005, 0.048]  |
|                  | MD      | -0.119 [0.126, 0.205] | -0.098 [0.125, 0.178]  | -0.002 [-0.028, 0.024] | -0.026 [0.005, 0.048]  |
| Middletemporal   | FA      | -0.119 [0.126, 0.205] | -0.098 [0.125, 0.178]  | -0.002 [-0.028, 0.024] | -0.026 [0.005, 0.048]  |
|                  | MD      | -0.119 [0.126, 0.205] | -0.098 [0.125, 0.178]  | -0.002 [-0.028, 0.024] | -0.026 [0.005, 0.048]  |
| Paracentral      | FA      | -0.119 [0.126, 0.205] | -0.098 [0.125, 0.178]  | -0.002 [-0.028, 0.024] | -0.026 [0.005, 0.048]  |
|                  | MD      | -0.119 [0.126, 0.205] | -0.098 [0.125, 0.178]  | -0.002 [-0.028, 0.024] | -0.026 [0.005, 0.048]  |

Values reflect average Marginal Effects (AME) and associated 95% confidence intervals. Colors reflect adjusted p-value thresholds. Note:  $p < 0.01$  (red),  $p < 0.05$  (orange),  $p < 0.1$  (blue),  $p < 0.05$  (dark blue).

Figure 4: AMEs with Uncorrected p-values < 0.1

MD NDI ODI
